# Supplementary material for: In situ synthesis of NiCo2O4/carbon nanocomposites: effect of carbon content and symmetric/asymmetric device configuration on supercapacitor performance
Source: Royal Society of Chemistry journal article supplement (doi:10.1039/d4nj02781g), 2024-01-01
Supplement: d4nj02781g1.pdf [file d4nj02781g1.pdf]

## Electronic Supplementary Information

### ***In Situ* Synthesis of NiCo<sub>2</sub>O<sub>4</sub>/Carbon Nanocomposites: Play of Carbon Content and Symmetric/Asymmetric Device Configuration on Supercapacitor Performance**

Raji Yuvaraja,<sup>a</sup> Sankar Sarathkumar,<sup>a</sup> Venkatesan Gowsalya,<sup>a</sup> Sorna Pandian Anitha Juliet,<sup>a</sup> Selvakumar Veeralakshmi,<sup>b</sup> Siva Kalaiselvam,<sup>b</sup> Shamima Hussain,<sup>c</sup> Selvan Nehru<sup>\*a</sup>

<sup>a</sup>Department of Physical Chemistry, University of Madras, Guindy Campus, Chennai - 600025, Tamil Nadu, India

<sup>b</sup>Centre for Industrial Safety, Anna University, Chennai - 600025, Tamil Nadu, India

<sup>c</sup>UGC-DAE Consortium for Scientific Research, Kalpakkam Node, Kokilamedu - 603104, Tamil Nadu, India

\*Corresponding author's email: [nehruchem@gmail.com](mailto:nehruchem@gmail.com)

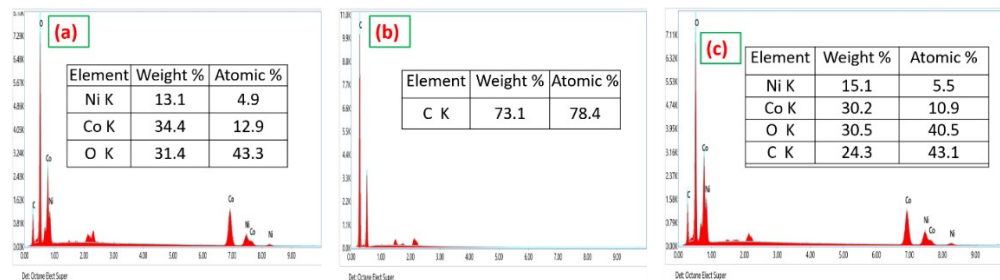

**Fig. S1** EDS analysis of the elements present in nanomaterials: (a) NiCo<sub>2</sub>O<sub>4</sub>; (b) CNS and (c) NiCo<sub>2</sub>O<sub>4</sub>/C (D2).

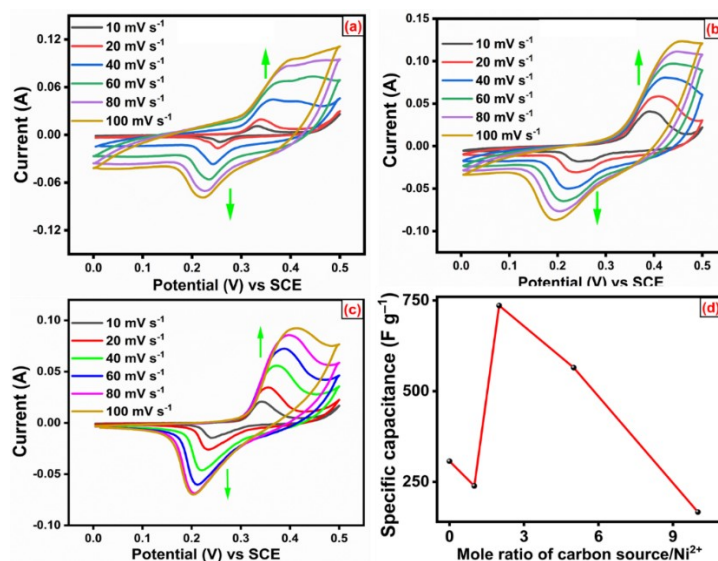

**Fig. S2** CV curves at different scan rates: (a) NiCo<sub>2</sub>O<sub>4</sub>/C (D1); (b) NiCo<sub>2</sub>O<sub>4</sub>/C (D5); (c) NiCo<sub>2</sub>O<sub>4</sub>/C (D10) and (d) Impact of carbon mole ratio with respect to Ni<sup>2+</sup> in NiCo<sub>2</sub>O<sub>4</sub>/C (Dx) based nanocomposites.

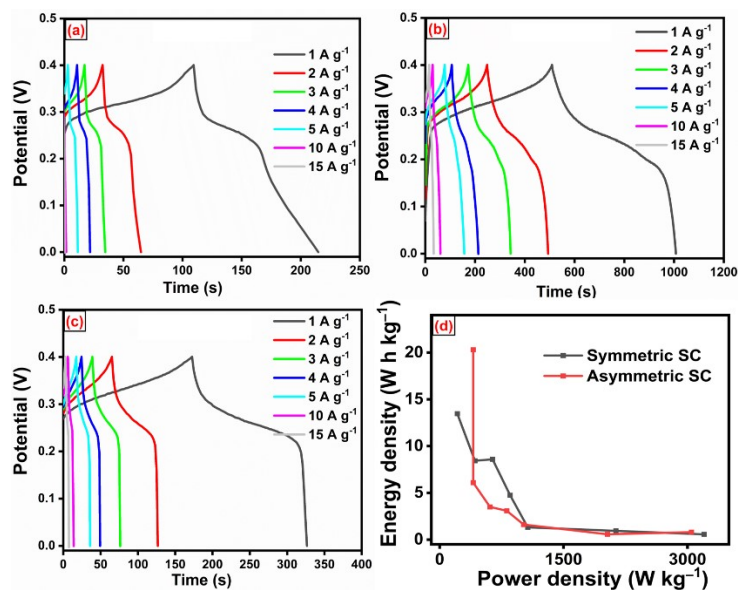

**Fig. S3** GCD curves at different current densities: (a) NiCo<sub>2</sub>O<sub>4</sub>/C (D1); (b) NiCo<sub>2</sub>O<sub>4</sub>/C (D5); (c) NiCo<sub>2</sub>O<sub>4</sub>/C (D10) and (d) Ragone plot of symmetric and asymmetric SCs.

**Table S1** Three electrode specific capacitance of NiCo<sub>2</sub>O<sub>4</sub>, CNS and NiCo<sub>2</sub>O<sub>4</sub>/C based nanocomposites at current density 1 A g<sup>-1</sup> using 3 M KOH electrolyte.

| S. No. | Electrode Materials                       | Specific capacitance (F g <sup>-1</sup> ) |
|--------|-------------------------------------------|-------------------------------------------|
| 1      | NiCo <sub>2</sub> O <sub>4</sub>          | 307                                       |
| 2      | CNS                                       | 52                                        |
| 3      | NiCo <sub>2</sub> O <sub>4</sub> /C (D1)  | 239                                       |
| 4      | NiCo <sub>2</sub> O <sub>4</sub> /C (D2)  | 736                                       |
| 5      | NiCo <sub>2</sub> O <sub>4</sub> /C (D5)  | 565                                       |
| 6      | NiCo <sub>2</sub> O <sub>4</sub> /C (D10) | 167                                       |

**Table S2** Comparison of the supercapacitor performance of NiCo<sub>2</sub>O<sub>4</sub>/C (D2) nanocomposite with similar and some advanced electrode materials.

| S. No. | Material                                                               | Methodology                               | Electrolyte | Specific capacitance (F g <sup>-1</sup> or *F cm <sup>-2</sup> ) | Cyclic stability (capacity retention %) | Ref.               |
|--------|------------------------------------------------------------------------|-------------------------------------------|-------------|------------------------------------------------------------------|-----------------------------------------|--------------------|
| 1      | Nitrogen-doped carbon capsules@NiO/NiCo <sub>2</sub> O <sub>4</sub>    | <i>In situ</i> calcination                | 3 M KOH     | 659                                                              | 93.5% after 8000 cycles                 | 1                  |
| 2      | Carbon/NiCo <sub>2</sub> O <sub>4</sub> composite                      | Hydrothermal                              | 3 M KOH     | 204.3                                                            | 90.35% after 3000 cycles                | 2                  |
| 3      | NiCo <sub>2</sub> O <sub>4</sub> /carbon-active composite              | Hydrothermal                              | 6 M KOH     | 273.5                                                            | 96% after 3000 cycles                   | 3                  |
| 4      | Carbon nanotube@NiCo <sub>2</sub> O <sub>4</sub>                       | One-pot co-precipitation                  | 6 M KOH     | 210                                                              | 92.70% after 2500 cycles                | 4                  |
| 5      | Porous marigold micro-flower like NiCo <sub>2</sub> O <sub>4</sub>     | Chemical bath deposition                  | 6 M KOH     | 530                                                              | 90.5% after 3000 cycles.                | 5                  |
| 6      | Submicron-sized NiCo <sub>2</sub> O <sub>4</sub>                       | Sol-gel method                            | 1 M KOH     | 217                                                              | 96.3% after 600 cycles                  | 6                  |
| 7      | NiCo <sub>2</sub> O <sub>4</sub> @g-C <sub>3</sub> N <sub>4</sub> (C)  | Hydrothermal                              | 3 M KOH     | 325.7                                                            | 93.6% after 2000 cycles                 | 7                  |
| 8      | NiCo <sub>2</sub> O <sub>4</sub> /carbon cloth                         | Hydrothermal                              | 6 M KOH     | 249.7                                                            | 63.3% after 1000 cycles                 | 8                  |
| 9      | NiCo <sub>2</sub> O <sub>4</sub> nanospheres                           | Laser ablation in liquid and hydrothermal | 1 M KOH     | 299.7                                                            | 90.4% after 10,000 cycles               | 9                  |
| 10     | Polypyrrole-decorated SrFeO <sub>3-δ</sub> perovskites on carbon cloth | Electrochemical deposition                | 6 M KOH     | 421                                                              | 63.6% after 3000 cycles                 | 10                 |
| 11     | Fe-substituted SrCoO <sub>3</sub> perovskites                          | Solid-state sintering                     | 1 M NaOH    | 527                                                              | 85.7% after 5000 cycles                 | 11                 |
| 12     | Fe <sub>3</sub> Mo <sub>3</sub> C/Mo <sub>2</sub> C@ carbon nanotubes  | Hydrothermal                              | 1 M KOH     | 202.3                                                            | 73.9 % after 4000 cycles                | 12                 |
| 13     | Cobalt vanadate on CoO urchin-like microspheres                        | Multi-step process                        | 3 M KOH     | *7.58                                                            | 84.6% after 5000 cycles                 | 13                 |
| 14     | NiCo <sub>2</sub> O <sub>4</sub> /C (D2)                               | <i>In situ</i> hydrothermal               | 3 M KOH     | 736                                                              | 84.9% after 1000 cycles                 | <i>This report</i> |

## References

1. Z. Guo, Y. Zhao, J. Mu, S. Li, F. Li, J. Wang, H. Yang, J. Mu, M. Zhang *Ceram. Int.*, 49 (2023) 19652-19663.
2. N.V. Nguyen, T.V. Tran, S.T. Luong, T.M. Pham, K.V. Nguyen, T.D. Vu, H.S. Nguyen, N.V. To, *ChemistrySelect*, 5 (2020) 7060-7068.
3. J. Xu, F. Liu, X. Peng, J. Li, Y. Yang, D. Jin, H. Jin, X. Wang, B. Hong, *ChemistrySelect*, 2, (2017) 5189-5195.
4. M. Shahraki, S. Elyasi, H. Heydari, N. Dalir, *J. Electron. Mater.*, 46, (2017) 4948-4954.

5. G.P. Kamble, A.A. Kashale, A.S. Rasal, S.A. Mane, R.A. Chavan, J.-Y. Chang, Y.-C. Ling, S.S. Kolekar, A.V. Ghule, *RSC Adv.*, 11, (2021) 3666-3672.
6. Y. Q. Wu, X. Y. Chen, P. T. Ji and Q. Q. Zhou, *Electrochim. Acta*, 56, (2011) 7517-7522.
7. Q.Y. Shan, B. Guan, J.M. Zhang, F. Dong, X.Y. Liu, Y.X. Zhang, *J. Nanosci. Nanotechnol.*, 19, (2019) 73-80.
8. S. Wu, Q. Liu, F. Xue, M. Wang, S. Yang, H. Xu, F. Jiang, J. Wang, *J. Mater. Sci.: Mater. Electron.*, 28, (2017) 11615-11623.
9. X. Liu, J. Wang and G. Yang, *Appl. Phys. A*, 123, (2017) 469.
10. Y. Qiao, J. He, Y. Zhou, S. Wu, X. Li, G. Jiang, G. Jiang, M. Demir and P. Ma, *ACS Applied Materials & Interfaces*, 2023, **15**, 52381-52391.
11. B. Yuan, Z. Su, K. Chen, J. Wang, B. Chen, S. Jiang, J. Yan, C. Zhang, A. Xie and S. Luo, *Diamond Relat. Mater.*, 2023, **136**, 110079.
12. Y. Jiang, X. Li, F. Liu, B. Wang, W. Zhou, S. Dong and X. Fan, *Appl. Surf. Sci.*, 2022, **576**, 151801.
13. Z. Jiao, Y. Chen, M. Du, M. Demir, F. Yan, Y. Zhang, C. Wang, M. Gu, X. Zhang and J. Zou, *J. Alloys Compd.*, 2023, **958**, 170489.
